# Supplementary material for: Detection of a Novel, and Likely Ancestral, Tn916-Like Element from a Human Saliva Metagenomic Library
Source: MDPI journal article supplement (doi:10.3390/genes11050548), 2020-05-14
Supplement: s1 [file s1]

Figure S1: TT31 Sequence

AAGCTTATTATATAACAGTGGAGCGATTACAGAATTAGGAAGCGTGGACAAAGGTACAACGAGGACGGATAA  
TACGCTTTTAGAACGTCAGAGAGGAATTACAATTCAGACAGGAATAACCTCTTTTCAGTGGGAAAATACGAAG  
GTGAACATCATAGACACGCCAGGACATATGGATTTCTTAGCAGAAGTATATCGTTCATTATCAGTTTTAGATGG  
GGCAATTCTACTGATTTCTGCAAAAGATGGCGTACAAGCACAACTCGTATATTATTTTCATGCACTTAGGAAAA  
TGGGGATTCCCACAATCTTTTTATCAATAAGATTGACCAAAATGGAATTGATTTATCAACGGTTTATCAGGAT  
ATTAAGAGAAAACCTTTCTGCCGAAATTGTAATCAAACAGAAGGTAGAACTGTATCCTAATATGTGTGTGACGA  
ACTTTACCGAATCTGAACAATGGGATACGGTAATAGAGGGGAAACGATGACCTTTTAGAGAAAATATATGTCCG  
GTAAATCATTAGAAGCATTGGAACCTCGAACAAGAGGAAAGCATAAGATTTTCAGAATTGTTCTCTGTTCCCTCTT  
TATCATGGAAGTGCAAAAGTAATATAGGGATTGATAACCTTATAGAAGTTACTACTAATAAATTTTATTCATC  
AACACATCGAGGTCAGTCTGAACCTTTGCGGAAAAGTTTTCAAAATTGAGTATTCGGAAAAAAGACAGCGTCTT  
GCATATATACGTCTTTATAGTGGCGTACTGCATTTGCGAGATTCGGTTAGAATATCGGAAAAGGAAAAAATAA  
AAATTACAGAAATGTATACTTCAATAAATGGTGAATTATGTAAATTGATAAGGCTTATTCGGGGGAAATTGTT  
ATTTTGCAGAATGAGTTTTTGAAGTTAAATAGTGTCTTGGAGATACAAAGCTATTGCCACAGAGAGAGAGAA  
TTGAAAATCCCCTCCCTCTGCTGCAACGACTGTTGAACCGAGCAAACCTCAACAAAGGGAAATGTTACTTGA  
TGCATTTTLAGAAATCTCCGACAGTGACCCGCTTCTGCGATATTATGTGGATTCTGCGACACATGAAATCATAC  
TTTCTTTCTTAGGGAAAGTACAAATGGAAGTGACTTGTGCTCTGCTGCAAGAAAAGTATCATGTGGAGATAGA  
AATAAAAGAGCCTACAGTCATTTATATGGAAAGACCGTTAAAAAAGCAGAGTATACCATTACATCGAAGTT  
CCACCGAATCCTTTCTGGGCTTCCATTGGTCTATCTGTAGCACCGCTTCCATTAGGGAGCGGAGTACAGTATGA  
GAGCTCGGTTTCTTTGGATACTTAAATCAATCGTTTCAAACCTGCAGTTATGGAGGGGATACGCTATGGCTGT  
GAACAAGGATTGTATGGTTGGAATGTGACGGACTGTAAATCTGTTTTAAGTATGGCTTATACTATAGCCCTG  
TTAGTACCCAGCAGATTTTCGGATGCTTGCTCTATTGTATTGGAACAAGTCTTAAAAAAGCTGGAACAGA  
ATTGTTAGAGCCATATCTTAGTTTTAAATTTATGCGCCACAGGAATATCTTTCACGAGCATACAACGATGCTC  
CTAAATATTGTGCGAACATCGTAGACACTCAATTGAAAAATAATGAGGTCATTCTTAGTGGAGAAATCCCTGC  
TCGGTGTATTCAAGAATATCGTAGTGATTTAACTTTCTTACAAATGGACGTAGTGTTTGTTTAAACAGAGTTAA  
AAGGGTACCATGTTACTACCGGTGAACCTGTTTGCCAGCCCCGTCGTCCAAATAGTCGGATAGATAAAGTACG  
ATATATGTTCAATAAAATAAAGTGTATTTTATGATGTTTCTTGCTTCGTTGATACCGCTGGCTAAAGAAATA  
CTGAATTTAAACTTAGTTTTATATGTGGTAAATGTTTTAATCAAGTTTAGGAGGAATTAATTATGAAGTGTA  
TGAATGTAAACAGGGTTCAATACAACCAATTTTAAATTTGGCTTGCATTTTATCTTTTTTAGCGTATTAAATGA  
AATGGTTTTGAACGTCTCATTACCTGATATTGCAAAATGATTTTAAATAAACCACTGCGAGTACAACTGGGTGA  
ACACAGCCTTTATGTAAACCTTTTCCATTGGAACAGCTGTATATGGAAAGCTATCTGATCAATTAGGCATCAAA  
AGGTTACTCTATTTGGAATTATAATAAATTGTTTCGGGTCGGTAATTGGGTTTGTGGCCATTCTTTCTTTCC  
TTACTTATTATGGCTCGTTTTATTCAAGGGGCTGGTGCAGCTGCATTTCCAGCACTCGTAATGGTTGTAGTTGC  
GCGCTATATTCAAAGGAAAATAGGGGTAAAGCATTGTTGCTTATTGGATCGATAGTAGCCATGGGAGAAGG  
AGTCGGTCCAGCGATTGGTGAATGATAGCCATTATATTCAATTGGTCTATCTTCTACTATTCTATGATAAC  
AATTATCACTGTTCCGTTTCTTATGAAATTATTAAGAAAGAAGTAAGGATAAAAGGTCATTTTATATCAAG  
GAATTATACTAATGTCTGTAGGCATTGAATTTTTATGTTGTTTACAACATCATATAGCATTTCTTTTCTTATCGT  
TAGCGTGCTGTCATTCCTGATATTTGTAAACATATCAGGAAAGTAACAGATCCTTTTGTTGATCCCGGATTAG  
GGAAAAATATACCTTTTATGATTGGAGTTCTTTGTGGGGGAATTATTTGGAACAGTAGCAGGGTTTGTCTCT  
ATGGTTCCTTATATGATGAAAGATGTTCCACAGCTAAGTACTGCCGAAATCGGAAGTGTAATTTTTCCCTGG  
AACAATGAGTGTCAATTATTTTCGGCTACATTGGTGGGATACTTGTGATAGAAGAGGTCCTTTATACGTGTAA  
CCATCGGAGTTACATTTCTTCTGTTAGCTTTTAACTGCTTCCTTTCTTTTAGAAACAACATCATGGTTCATGAC  
AATTATAATCGTATTTGTTTTAGGTGGGCTTTGTTTACCAAAAACAGTTATATCAACAATTGTTTCAAGTAGCTT  
GAAACAGCAGGAAGCTGGTGTGGAATGAGTTTGCTTAACTTTACCAGCTTTTATCAGAGGGAACAGGTATT  
GCAATTGTAGGTGGTTTATTATCCATACCTTACTTGATCAAAGGTTGTACCTATGGAAGTTGATCAGTCAAC  
TTATCTGTATAGTAATTTGTTATTACTTTTTTTCAGGAATCATTGTCATTAGTTGGCTGGTTACCTTGAATGTATAT  
AAACATTCTCAAAGGGATTCTAAATCGTTAAGGGATCAACTTTGGGAGAGAGTTCAAATTTGATCCTTTTTT

ATAACAGGAATTCAAATCTTTTTGTTCCATTAAAGGGCGCGATTGCTGAATAAAAGATACGAGAGACCTCTCTT  
GTATCTTTTTTATTTTGTAGTGGTTTTGTCCGTTACACTAGAAAACCGAAAGACAATAAAAAATTTTATTCTTGCTG  
AGTCTGGCTTTTCGGTAAGCTAGACAAAACGGACAAAATAAAAAATTGGCAAGGGTTTAAAGGTGGAGATTTTT  
TGAGTGATCTTCTCAAAAAATACTACCTGTCCCTTGCTGATTTTTAAACGAGCACGAGAGCAAAACCCCCCTTT  
GCTGAGGTGGCAGAGGGCAGGTTTTTTTTGTTTCTTTTTTCTCGTAAAAAAAAGAAAGGTCTTAAAGGTAAGAA  
CTTGATGCTGGGGTGTGCCCTTATTTTCAATATTAGTTAAGTACCGTGGGTCAATTTCAATCAATGCTCCCA  
CTTGTTACGAGTTAAACCTCGTTTCAATCGAGCTTCTTTAATGGCTAAACCAAAGGCTCTAAAATCATATTTAT  
CTTCTTTTTTACGCATAGTAGACCACCTCTATACATTTTATTGTTCTACTGAATTAGAAACAGGTATAGAAAAA  
CATGTTATATAGTTTATAGGTTCAATTTAATAAAAAAGCACTACTAAACGCCAATAAAAAAACCGTTATATGG  
TAGTGCTATTTATGCTGTTAAAATATTGTATCTTACTTCCAAATGGCGGTTTGTGGAGGTCAAAGTCGCCATG  
AAGTATATCACATACAATCAAGTTCACATTGAGTATTTATCAAAAAAGTCGTCTATCTGCAATAGATAAG  
TACGTCCACCAATGTGGTTTTATAAATCATATAGATAGAATAACAGAAGCATGTAAACAGAGAAATAAATCTG  
TTTATATGCTTTTTTGCTATTCAAGAACTTTTTACAAAGTTTATTTATCAGTAATGCAACAAATCCCCCTTTCAC  
ATTGGGACTAAGAGTGAAAGGAGATAAACGAGCAAGGCTCACTTCTTTCTAGACAGAAAGGGGGTGAGA  
AACATGAAACCATCTTCTTTTTCAGACCACAATAGAAAATCAGTTTGACTATATCTGTAAACGTGCTATGGAAGA  
CGAGCGAAAGAATTATATGCTTTATCTTTCAAGGATTGCAAAGCGTGAGGTGTCCTTTTCGGATGTTGGCGAT  
TATCTTGTTAGCCAGTTTGCGACAACAGATAACTATTCAACTGACTTTCAGATTTTTTACTCAATGGGTTATCA  
GTAGGCGTTGAAAATGATTTGTTGAGTGAAGCATTACGTGAGTTGCCAGACAAGAAACGTGAAATTCTACTGC  
TGTTTTACTTTATGGACATGAGCGATTCAAGAAATTGCAGACCTGTTGAAATTGAACCGTTCTACTGTCTATCGG  
CATAGAACCAGTGACTAGCCTTAATTA AAAAGTTTATGGAGGAATTTGAAGAATGAAACACAATATCCTAT  
GATTCCCTTCTCTCATTGTAAAGGCAACAGATGGCGATACAGAAGCGATTAACCAGATTCTACATCATTACA  
GAGGGTACATAACGAAACGTTCCCTACGACTTATGAAAGATGAATATGGCAATCAAAGTATGGTCGTTGATG  
AAGTCTTACGTGGAAGAATGGAACCAAGACTGATTACAAAGATTCTGTCAATTTGAAATTAAGTAATAACCTCT  
CTCTTTTCGTGGAAGCGTGCCATACTATTCCACGCTTCCCGAACAGGGAGGTTTGTTATTCCATCAAAGCATAT  
TGAGCTTTCAATGTGTTTTGATAGGCTAACGAGCCATTGTTCTTTGAAAAGTGAATAAAAGTAATTGAATACGT  
TTCGATAAGAAAAGAGCCAACGGAGCTAACCGCCATGACCTATCTTCTAAAGATAGCGAGCGTTTCAGTTAGT  
GTTCCGAAAAACAATCTTTAGCAGGATTGCCAGCGACGACTTCTTATCGTGATAATGATACTCCCATACAGTC  
AATAGTCCGAGCGTTAAAAGCGTCGCAGGCAATGAGTATGGCTACATGAGAACCATGCAGGGGTGGAACCTC  
CGTGAGCTTTGCTAAAGCTGTTGATTGCTTGTAACAACCTTTTATGAAATCCAATAAGTGATTTGGAAGGA  
GGATTTTATGAAGCAGACTGACATTCCGATTTGGGAGCGTTATACCTAACTATTGAAGAAGCGTCAAAATAT  
TTTCGTATTGGCGAAAAACAAGCTGCGTCGTTTGGCAGAAGAAAATAAAAATGCAAAGTGGCTGATTATGAATG  
GCAATCGTATTCAGGTAAACGAAAACAATTTGAAAAATTATAGATACATTGAACGCAATCTAGCGTAGCCA  
AAGGGTCTTGTATATGATAAAATAGTATTAAGTCGTATCAGGGCTCTTCCATAATGGAAAGGAGCAAATGCC  
ATGTCAGAAAAAAGACGTGACAATAAAGGTGCAATTTTAAAGACTGGAGAGAGCCAACGAAAAGACGGAAG  
ATACTTATACAAATATACAGATTCATTTGGAGAACCGCAATTTGTTTACTCGTGGAAGTGTGGCTACAGACA  
GAGTACCAGCAGGAAAGCGTGATTGTATCTCACTTAGGGAGAAAATCGCAGAGTTACAGAAAGACATTCATG  
ATGGTATTGATGTTGTAGGAAAGAAAATGACACTCTGCCAGCTTACGCAAAACAGAACGCTCAAAGACCAAA  
GGTTAGAAAAAATACTGAAACTGGACGCAAATATCTTATGGATATTTTGAAGAAAGACAAGTTAGGTGCAAG  
AAGTATTGATAGTATTAACCATCAGACGCTAAAGAATGGGCGATTAGAATGAGTGAAAATGGTTATGCCTAT  
CAAACCATCAATAACTATAAACGTTCTTTAAAGGCTTCATTCTACATTGCGATACAAGATGATTGTGTTGGA  
GAATCCATTTGACTTTCAACTGAATGCAGTTCTTGATGATGATACTGTCCCTAAGACCGTACTAACAGGAGAAC  
AGGAAGAAAAACTGTTAGCCTTTGCGAAAGCTGATAAACCTACAGCAAAAATTATGATGAAATTCTGATACT  
CTTAAAAACAGGTCTTCGTATTTTCAAGATTTGGTGGTTTGACACTTCCAGATTTAGATTTTGAAGATCGTCTGT  
CAATATAGACCATCAGCTATTGAGAGATACTGAAATTGGGTACTACATTGAAACACCAAAGACCAAAAAGTGGT  
GAACGTCAAGTTCCTATGGTTGAAGAAGCCTATCAAGCATTTAAGCGAGTGTTAGCGAATCGAAAGAATGAT  
AAGCGTGTTGAGATTGATGGATATAGTGATTTCTCTTTCTTAATAGAAAGAACTATCCAAAAGTGGCGAGTG  
ACTATAATGGTATGATGAAAGGTCTTGTTAAGAAATACAACAAGTATAATGATGATAAGTTACCACACATCAC  
TCCACATAGTTTGCACATACATTCTGTACCAACTATGCAATGCAGGAATGAACCCAAAAGCATTACAATACA

TTATGGGGCATGCAAATATAGCCATGACGCTGAACTATTACGCACACGCAACATTTGATTCCGCAATGTCAGA  
GATGAAACGCTTGAATAAAGAGAAGCAACAGGAGCGTCTTGTTGCTTAGTAGTACAAATGAATTTACTACTTA  
TTTACCCTTCTGACAGCTAAGACATGAGGAAATATGCAAAGAAACGTGAAGTATCTTCCTACAGTAAAAATA  
CTCGAAAGCACATAGAATAAGGCTTTACGAGCATTTAAGAAAATATAAAAAGATAATTAGAAATTTATACTTT  
GTTTAATATAAAAAATTACACAATATAATTATCACTTTAAATTTATGTTAACTAACACTATATATAAAATTTATTAT  
TTCTATAAAAAAACTAGAAAGCTACTTTATTCACCTTAGTTTAAATTTCTATTTATTTAACATACCTGCTTGAAG  
TTGGTACATTTTGAATAATTACCTTTTAATGCTATCAACTCATCATGTGTTCCAGATTCAATAATTTACCTTTA  
TCTAGTACGTAGATACAGTTAGAATCTTGAATCGTAGATAATCTATGAGCAATCGCTATTGTTGTTCTACCTTTT  
CTCATTTTTTCAAGAGAGTTTTGAATCAGCTCTTCTGTTTCAGAGTCGATATTTGCAGTAGCTTCATCAAGAATC  
AGGATCTTCGGCTTACTTGCTATAGTTCTAGCAAATGTTAGAAGTTGTCTTTCTCCAGATGAGAATGTTGAACC  
TCTTTCTGTAACACTACACTATCATACTTATCTTCTAATTTATCTATAAAATTATGTGCATCAACAACTTCGCCGCT  
TCAATAACATCTTCTCTGTTAGACTTTCATTATACATCTTAATATTAGACTCTACTGTTCCGTGATATAAGAATG  
GATCTTGAAGTACTAATCCAACACTGTTTCTTAATCTTTAGAACTATAATCTTTAATATTAACCTCCATCAATTA  
GATTTCTCCTCTATCATAATCATAGAATCTTAAGAATAGATTCAATAAGAAGATTACCGGAACAGTAGCTC  
CAACAAACGCTATACTCTCTCCATTTTTAACACTAAATGAAATATTTTTAAGAACATCTCGTTTACCATCGTAAG  
AGAAGCTAACATTTTTAACTCGATATCACCACGAGAAATTTTATAATCACTCTCTTTTTGCTCAGGCTCATACT  
CTTCATTATCTATTAATGTGAAAACACGACCTGCAGAAATAATAGATGTTTGAAGAATTGAGAAGTTTTGCATA  
AGTTCAATTAATGGATTGAACAGCTGATTTCGTATATTGAATAAACGCATATATTATCCCAGCAGTAAACCAGC  
ACTTTCAAAGTTAACCCAAAATACATTACGATAACACCATATGCTAACACTTTAAATAATGCCATAGCTGGTC  
TTAATAATATACTATCAACTTTTAATGATTTAGTGTAATAACGAAGGTGTTCAATTATTAACCTCTCCAAATTCAT  
CAATCAGGCGTTGTTCTGATTAAATGCTTGATAATCTTCATACCTTCAATTGATTAGATAATTTAGTATTCA  
TTTCACTAATTTTCGCACGAGAAATTTCTACTAATCTACTAGAAAGCTTCTGATATAAGTATACTGAACCTACCA  
TTACAGGAATAAATAGTATCATGTAAATTGTTAATTGCCAATCTAGAGCAATCATCGCAGAAAGTGTTACTACA  
AACATAAGTATAGTATTTAAGAACTTGAGAAAATTGTTCCAAACATATCCGCAACAGCCTGTGTATCATTAGT  
TAATCTCGATACGACAGAACCTACAGGAGTTTTATCGAAGTACGACATCCCTAATTTTTGCAAGTTAGCAAAAC  
TATCATTACGTAGATCTCTAACTATACTGTGAGCTACTTTGCGAAGTAATACTCTCTAAAAATGTAAACACAA  
CTCTTAGGATAAACAATCCAAAATAAATTATTAATATATATAATCCAGCTTTAGCAATATTCTTTGTAATATAAT  
GATCAATATAATACTGAGCTAAAAGAGGAATTGCTGTTGCGACTATCGAAGTCATTAATATAAATAATAGTGC  
TAAAATCGATAATCCTTTATAGCGCAACATATAGCGCATTAAATCTAAAAACGTCTTACTTTTCGACATTTTCAC  
TTCCTCCTTTCAAGCTTTCTTCATCTGTTGACTTTCATAAGTCTCTTTATACCAACCGTTATTGGCGATAAGTTC  
ATCATGAGTTCCTTTTTCAATAATTGTGTTATCACCTAAAACAATTATTAATCAGCTTCCACTACCGCAGAAAG  
TCTATGTGCAGTAATGATATTAGTTTGACCACTACGTTGTTCTTTCAAGTTCTCTAAAATAACATGTTCAGTCTT  
AGCATCAACCGCAGATAATGAATCATCAAGGATTAAAATTTAGGATTAATAATTAAAGCAGGACTCATCGCT  
AAACGTTGTTTTGACCACCTGAAAGACTAACACCTTTCTCACCAACAATCGTATCAAACCTCTCAGGCATAGC  
CATAATATCATCATACAGACCACAAAATTTGTAATCTCTTCTACCTTCTTATCATCAATTAAGGATTAGCAAA  
ACGAATATTCTTTAATCGACATTGCAATAATACCTGATCTTGAGGTACATATCCGATAAGTTTTCTAAGGTC  
ATTAATACTATATTCAGCAATGTCTCTATTGTTAAGCATAATATTACCAGATTTAATATTAATTTCTCTTAATAAC  
AGTCTTAATAATGTAGTTTTACCTGCTCCAGTAACACCTACGATACCAAGTGTTTGACCTTTTTCAATAGCAAAC  
TTAATATCTCTTAGGACACTCTTACCTTCTCAAATTCGAAGTTGTTGATATTATACTCAAGTCTACCATTCTCAG  
CCTTAACGTTACTATCTAAGTTAGTATTTACCTCATTAACCTCAGCTAATAAACTCTCAATACGTTTATAAGATAC  
TTCACCACGTTGTGAAATATTGTATAACCATCCTATTGCTTGAAGCGGCCATACTAACATATCAAGATAAGTCA  
CGAAAGTAACTAACTACCAACAGATAAATCACCATTGGAGATAAAAAATACCACCGAAAACAAGAGTAAGTG  
TATAAGATAATCCAACGAAGATTAATACCATTTGGATCAAATAATGAATTATACTTAGCAGCTATAACATTTTTA  
CCAAATACTTTGTTATTAACCTTCTCTAAAACCTCTAATCTCATCATTACCATAACCAATGATTTAGTAACCTTTA  
TACCAGAGGCACCTTCTTGAACCTTATTATTCAAGTCAGAAAATGACTCCTGTGCTGCCTCAAACTCTCATAGT  
TTTTATCCCCGATATAATTAGTAGCATACGCTAAAAATGGTAAAGGAATAATTGCTATTAAAGTCAGTTTGAAG  
TCAATTAATAATATCATCGTAAATAATGTCACTAATGCTGTAATACTTGTCATCAACCGCTGACATTACTCCACCA  
CCAGCAACCATTTGCTACAGAATTTATATCATTCGTTGCATGGGCCATTAAATCACCTGTACGGTATTTTTGAAA

GAACGATGGAGACATCTTAGTAAAGTGTTCAAATAATCTTGATCTTAAGATTCTTCCTAAGTTATATGCTGCTC  
CAAAAAATATAAACACGCCAAACATAACGAAGTGCATACATCGCAAGTGCTGCCAGTACAAGATATCCAACATT  
TAAGAATAACTCTCCATTAGTTAAATTTCCAGCCTCAATTTTATCAATAACAGTCCCGATAACTTTTCGGTGGAAT  
TAAGTTGAAAATACTTACTAAGATAAGGGCAATTATTCCAATAAGATAACGTCTTTTTTCTAGCTTCATAAACC  
AAGCTAATTTTCTAAATAAATACATCTACACATCACCTAACCTTTCTCCTAATTTTGAAAATACTTCTCCAATTTT  
ACCATTAATTACTAAGTCAGCCATATTGTCCTGAGGAGTAGACGATTTATTAATAACAACCTAAATGTTTTCTCTC  
AAAGTAATGTAAAAGATTTGCAGCTGGATAAACACTTAATGAAGTACCACCGATAATTAGCACATCAGCTCTT  
TCAATAAAGTTAATCGCAGCATTAAATACTGTCATATCTAATTCTTCTTCATATAAAGTAACATATGGTTTTATA  
ATTCCACCACATTTATCACAACCTCGGTATTTCTTCAGTTTTAGCTAAAAAATCTTCTAAGTTGTAAAAACTTTTAC  
ACTTAGTACAATAATTAGCATCAACACTTCCATGAAGTTTCAAAACATTTTTACTGCCTGCTTGTTTCATGTAAAG  
TATCAATATTTTGTGTAATTACCGCTTTAAGTTTACCTTGTTTTCTAAATCAGCTAAATAAAAAATGAGCTCTATT  
CGGTTTAGCATCAGGATATACTAAATGTTTTTTGTAAAAATCAAAGAAATCTACAGGATACTTCACAAACATTG  
TTCTAGAAACGAGTTGTTTCAGGTGTAAAGTGACGATTTAGTTTAAACATTAACACTCCATTTCGCACTTCTAAAG  
TCAGGAATATCAGATTCAGTAGAAACACCTGCACCACCAAAAAAGACAATATTATCATTGATTCTATTATTTCT  
TCTTAGTTTCTCTATATTATTCATAATACTTACCTCCTTATAAAATATTATAAAAGCCATGAAAAGAAGGAAACC  
CTTATATAAGTCTCCTTCTTTCAATTAACCTACTAATTAGTTTCTTTATCTTTTTGAGCTTTTAACTCTTTAATACGT  
TGCTTACGCTCTTCGATACGAGCTTTTTTCTCTTCACGAGATGCACTCTTAACAGGTCCACGAGCGATATGTTCT  
TACTATCGTTAGTTACAAGGTTAGTTGGTTCTTGTTTCATTTTCGATTTCTTCATGACGTTCTACTCTAATACGCA  
TTAAGTTAGTAACAACCTTCTACCTGAATATCGTCGATCATATCCTCGAACATTTGGTAACCTTCTGTTTTGTATT  
CACGAAGTGGATCAATTTGTCCATAAGAACGAAGGAAAATCCCTTTTCTAAGTTGATCCATTGTTGTCGATGTG  
ATCAGTCCATCTATCATCGATAGCGTTAAGAAGAATGTATTTCTCGAATGAATTCATAGTTTCATCTCCAAGTA  
ACTCACGTTTCTCAGCTAACTCAAGATTAATTCTGTGTAATACAAGCTCACGAATTCATCATCAGACATAACAT  
CTGAGTATTCATTTCAGTAATAGGTTTTGACCTAAGAACTTCTCATTAAAGTGATTTGATGATTTCTTCAGTTT  
CTTCTTTTTCACTGTGTGCTTCTAAGTTTTCTAGTGATAAATGCCATAGTTTTATCTACTGCTTCACCAATCATCTC  
TTGAATAATATCAGTAACTACATCATTTTCTAACACTTCATTTCTTCAGCGTACATGATTTACGTTGTTTACGT  
AATACATCATCATATTGAAGTACTTGTTACGTGAGTCATAGTTATTACCTTCAACACGTTTTTGAGCACTTTTCA  
ACAGATCTACTAACCATTCTACTTTCAAGTGGTGTATCTACATCTTTACCCATGATTTTTTGTAACTATCAGCTC  
CGAAACGAACCATAAGTTCATCTTCTAGAGATAGATAGAATCTACTGTAACCTGGATCCCTTGACGTCCTGAA  
CGACCACGTAATTGGTTGTCAATACGACGAGATTTCGTGACGTTCTGTACCGATAACGGCAAGACCACCTAATT  
CACGAACACCTTCTCCAAGTTTAATATCCGTACCACGACCAGCCATGTTAGTCGCGATAGTTACTGAACCACGT  
TGTCCAGCTTGTTTAATAATTTCTGCTTCACTTTCATTTTGCTTAGCATTAAAGTACTTTATGAGGAACACCGTATT  
TGTATAATAATTTAGATACTAATTCACCTCGTTTCGATAGAAACAGTACCTAAAAGAACTGGTTGTCCTTTATCAT  
AACGTTCTTTAACTTCTTGAGCTACTGCATTGAACCTAGCTTCCATATTTGAGTAAATGAAGTCTGGTGCATCAA  
TCCTTTGGATTGGTCTGTTTCGTAGGAATTGTAGTTACAAACATGTTATAAATGTTTCTAAATCTTCTCTCTGT  
TTTACCAGTACCTGTCATACCACTAAGTTTTTATACATTCTGAAGAAGTTTTGGAATGTAATAGTCGCCATTGT  
TTTACTTTCTTTTTGAATCGGCACACCTTCTTTAGCTTCGATAGCTTGGTGTAACCTTCAGAGAAACGACGACC  
AGGCATTGTACGACCTGTAAATTGGTCAACGATTAATTTCTCCATCTTCAGCAACTACATAGTCAACATCTA  
GTGCCATTGTGTAGTTAGCTTTAATGCTTGGTTAATGTGGTGAGTTAAATCAACATTTTTTAATTCATAAAGAT  
TTTTTAATCCAAAGTAACTTTCCGCTTTATCAATACCATTTTCAGAAAGTTGGATAGCTTTAGTTTTAATATCTAA  
AGTATAATCTCCATCACTTCCATCTTCTCTCTGCTTTTTTTCAGAGTTTTAACGAAGGCATTTGCAACTTGGTAT  
AATGAAGTTGATTCTTGACCTTCACCAGAGATAATAAGTGGTGACGTGCTTCATCGATAAGCACTGAGTCAA  
CCTCATCGATCACAGCATAGTTAATGGACGTTGAACACGCGCTTCAACTGTTTTAACCATGTTATCTCTTAAGT  
AGTCAAACCTAACTCGTTATTTGTTGAGTATGTAATATCAGCGTTATATGCTGCTTTTTCTCTTCAGAGTTTA  
AAGAGTTTAAGTTAAGACCTACAGAAAGTCCCATGTAGTTATAGAAAACCTCCCATCTCTTGAGCGTCACGTTG  
AGATAAGTATTCGTTAACTGTAAACACGTGTACACCTTCACCTGCTAATGCGTTTAAGTATACTGGCATTGTCTG  
CAGTAAGAGTTTTACCTTCCCCTGTTCTCATCTCCGCGATATCCCCACGGTGAAGTGCGATACCACCCATGATTT  
GAACTTTATATGGTTTTATTCTAGAGAACGTAGTGCACCCTCACGAGCTGCAGCAAACGCATCTACTAAAATT

TTATCTAATATATCCGGTGTATCTTTACCTTTTTCTTTTGTTCTTGAATATAAGCTTTAAATTCTTCTGTTTTATT  
ACTAATTCTTCATCGCTAAGATTTGAATATTCTTCATCTTTAGCTAATACTTTATCAGCTAATTTTGATAAGCTT
