# Supplementary material for: Detection of a Novel, and Likely Ancestral, Tn916-Like Element from a Human Saliva Metagenomic Library
Source: MDPI journal article supplement (doi:10.3390/genes11050548), 2020-05-14
Supplement: s1 [file s1]

Table S1: Primers used in this study.

| Name     | Sequence (5'-3')            | Purpose                   | Source/Reference |
|----------|-----------------------------|---------------------------|------------------|
| pCC1-F   | GGATGTGCTGCAAGGCGATTAAGTTGG | End sequencing of pCC1BAC | Epicentre®       |
| pCC1-R   | CTCGTATGTTGTGTGGAATTGTGAGC  | End Sequencing of pCC1BAC | Epicentre®       |
| TT31_F1  | GGTTGACTCAGTGCTTATCG        | Sequencing of TT31        | This Study       |
| TT31_R1  | GAGGTCAGTCTGAACTTTGCG       | Sequencing of TT31        | This Study       |
| TT31_F2  | GAAGATGGAAGTGATGGAG         | Sequencing of TT31        | This Study       |
| TT31_R2  | GCAAACGACTGTTGAACC          | Sequencing of TT31        | This Study       |
| TT31_F3  | CTATCGCGACTAACATGG          | Sequencing of TT31        | This Study       |
| TT31_R3  | CTGCTCGGTGTATTCAAG          | Sequencing of TT31        | This Study       |
| TT31_F4  | CGTAATGGTTGTAGTTGC          | Sequencing of TT31        | This Study       |
| TT31_R4  | CGATTGGTGGAAATGATAGC        | Sequencing of TT31        | This Study       |
| TT31_F5  | GCTAAACCGAATAGAGCTC         | Sequencing of TT31        | This Study       |
| TT31_R5  | GCTTTCGTTACCAAAACAG         | Sequencing of TT31        | This Study       |
| TT31_F6  | CGAAAGTTATCGGGACTG          | Sequencing of TT31        | This Study       |
| TT31_R6  | CTTTGCTGAGGTGGCAG           | Sequencing of TT31        | This Study       |
| TT31_F7  | GTTAGTATGGCCGCTTCAAG        | Sequencing of TT31        | This Study       |
| TT31_R7  | CCATCTTCTTTTCAGACC          | Sequencing of TT31        | This Study       |
| TT31_F8  | CGTTTAGCGATGAGTCGTG         | Sequencing of TT31        | This Study       |
| TT31_R8  | CTAACGAGCCATTGTTC           | Sequencing of TT31        | This Study       |
| TT31_F9  | GTAGGTTCTGTCGTATCG          | Sequencing of TT31        | This Study       |
| TT31_R9  | GTCGTATCAGGGCTCTTTCC        | Sequencing of TT31        | This Study       |
| TT31_F10 | CTTACGATGGTAAACGAG          | Sequencing of TT31        | This Study       |
| TT31_R10 | CCGTACTAACAGGAGAACAG        | Sequencing of TT31        | This Study       |
| TT31_R11 | CGCTGAACTATTACGCACAC        | Sequencing of TT31        | This Study       |
